# Supplementary material
Source: MDPI journal article supplement (https://www.mdpi.com/2673-4117/4/1/56)
Supplement: s1 [file s1]

| Catalyst and Concentration |    | Density,<br><i>gmL<sup>-1</sup></i> | Calorific power,<br><i>Jg<sup>-1</sup></i> | Kinematic viscosity,<br><i>mm<sup>2</sup>s<sup>-1</sup></i> | Free acidity,<br><i>mgKOHg<sup>-1</sup></i> | FAMEs,<br>% | Linolenic Acid (C18:3),<br>% | Yield,<br>% |
|----------------------------|----|-------------------------------------|--------------------------------------------|-------------------------------------------------------------|---------------------------------------------|-------------|------------------------------|-------------|
| NaOH, 0.5 %                | E1 | 0.88007                             | 39758                                      | 4.7594                                                      | 0.2242                                      | 93.2771     | 2.5604                       | 88.0317     |
|                            | E2 | 0.87839                             | 39741                                      | 4.6428                                                      | 0.3363                                      | 93.7549     | 2.5474                       | 83.8040     |
|                            | E3 | 0.87920                             | 39590                                      | 4.6849                                                      | 0.3362                                      | 92.8658     | 2.5042                       | 86.0534     |
| NaOH, 1 %                  | E1 | 0.88010                             | 39714                                      | 4.7283                                                      | 0.2240                                      | 90.7550     | 2.4497                       | 78.1405     |
|                            | E2 | 0.88051                             | 39834                                      | 4.6844                                                      | 0.4485                                      | 93.0674     | 2.5632                       | 79.1296     |
|                            | E3 | 0.88005                             | 39744                                      | 4.5816                                                      | 0.4483                                      | 81.8495     | 2.3266                       | 77.2635     |
| KOH, 0.5 %                 | E1 | 0.88032                             | 40142                                      | 4.6204                                                      | 0.2802                                      | 92.1160     | 2.5419                       | 94.9555     |
|                            | E2 | 0.88195                             | 39460                                      | 4.7736                                                      | 0.4483                                      | 94.0299     | 2.5974                       | 92.9773     |
|                            | E3 | 0.87981                             | 39576                                      | 4.6867                                                      | 0.3364                                      | 93.1060     | 2.4757                       | 91.6381     |
| KOH, 1 %                   | E1 | 0.87934                             | 39744                                      | 4.7018                                                      | 0.3365                                      | 94.5221     | 2.5375                       | 95.9446     |
|                            | E2 | 0.87771                             | 39725                                      | 4.7045                                                      | 0.3355                                      | 96.0229     | 2.6392                       | 93.9664     |
|                            | E3 | 0.87965                             | 39713                                      | 4.6181                                                      | 0.5601                                      | 95.0250     | 2.6789                       | 90.0099     |

| Parámetro           | Values |          | Df | Sum of squares | Mean of Squares | F         | P value |         |
|---------------------|--------|----------|----|----------------|-----------------|-----------|---------|---------|
| Density             | Min.   | 0.8777   | P. | 3              | 6.342e-06       | 2.114e06  | 2.723   | 0.114   |
|                     | Max.   | 0.8820   |    |                |                 |           |         |         |
|                     | Mean   | 0.8798   | R. | 8              | 6.210e-06       | 87.763e07 |         |         |
|                     | STD    | ± 0.0011 |    |                |                 |           |         |         |
| Calorific power     | Min.   | 39460    | P. | 3              | 6908            | 2303      | 0.063   | 0.978   |
|                     | Max.   | 40142    |    |                |                 |           |         |         |
|                     | Mean   | 39748    | R. | 8              | 291705          | 36463     |         |         |
|                     | STD    | ±172.72  |    |                |                 |           |         |         |
| Kinematic viscosity | Min.   | 4.582    | P. | 3              | 0.00201         | 0.000670  | 0.153   | 0.925   |
|                     | Max.   | 4.774    |    |                |                 |           |         |         |
|                     | Mean   | 4.682    | R. | 8              | 0.03494         | 0.004368  |         |         |
|                     | STD    | ± 0.0580 |    |                |                 |           |         |         |
| Free acidity        | Min.   | 0.2240   | P. | 3              | 0.01121         | 0.003737  | 0.46    | 0.718   |
|                     | Max.   | 0.4485   |    |                |                 |           |         |         |
|                     | Mean   | 0.3502   | R. | 8              | 0.06495         | 0.008119  |         |         |
|                     | STD    | ± 0.1198 |    |                |                 |           |         |         |
| % FAMES             | Min.   | 81.85    | P. | 3              | 71.27           | 23.757    | 2.584   | 0.126   |
|                     | Max.   | 96.02    |    |                |                 |           |         |         |
|                     | Mean   | 92.53    | R. | 8              | 73.56           | 9.195     |         |         |
|                     | STD    | ± 3.6286 |    |                |                 |           |         |         |
| Yield               | Min.   | 77.26    | P. | 3              | 465.8           | 155.26    | 35.98   | 5.42e-5 |
|                     | Max.   | 95.94    |    |                |                 |           |         |         |
|                     | Mean   | 87.66    | R. | 8              | 34.5            | 4.32      |         |         |
|                     | STD    | ± 6.7441 |    |                |                 |           |         |         |

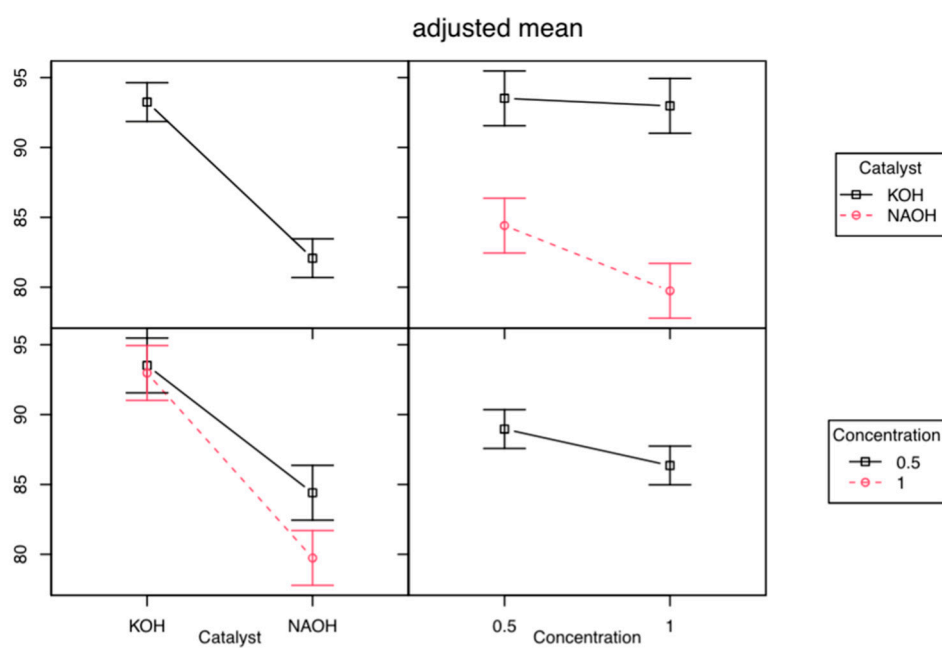

Figure S1: Plot of main effects and interactions for performance

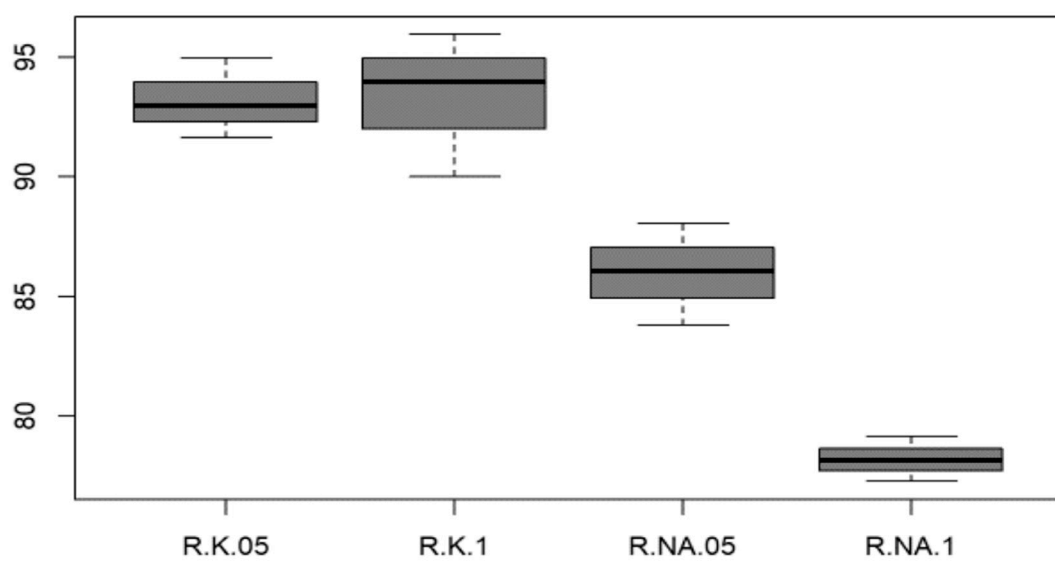

Figure S2: Boxplots
